# Supplementary material for: Super-fast iodine capture by an ionic covalent organic network (iCON) from aqueous and vapor media
Source: Royal Society of Chemistry journal article supplement (doi:10.1039/d2su00117a), 2023-01-01
Supplement: d2su00117a1.pdf [file d2su00117a1.pdf]

## Super-Fast Iodine Capture by an Ionic Covalent Organic Network (iCON) from Aqueous and Vapor Medium

Prince<sup>[a]</sup>, Atikur Hassan<sup>[a]</sup>, Sohom Chandra<sup>[a]</sup>, Akhtar Alam<sup>[a]</sup>, Neeladri Das<sup>[a]</sup>\*

<sup>[a]</sup>Department of Chemistry, Indian Institute of Technology Patna, Patna 801106, Bihar, India

Corresponding author. E-mail: [neeladri@iitp.ac.in](mailto:neeladri@iitp.ac.in), [neeladri2002@yahoo.co.in](mailto:neeladri2002@yahoo.co.in)

Tel: +91 9631624708

| <b>Table of contents</b>                                                                                                 | <b>Page no.</b> |
|--------------------------------------------------------------------------------------------------------------------------|-----------------|
| Scheme S1: Synthesis of triaminoguanidium chloride (TAG <sub>Cl</sub> ) .....                                            | S3              |
| Table S1: Solubility/insolubility chart of iCON-4.....                                                                   | S-3             |
| Figure S1 : NLDFT pore size distribution of iCON-4.....                                                                  | S-4             |
| Figure S2: FTIR spectra of the iCON-4 along with acid and base treated iCON-4.....                                       | S-5             |
| Table S2: Comparison table of time required to remove iodine adsorbents from aqueous solution.....                       | S-5 to S-6      |
| Figure S3. Change in concentration of iodine with time.....                                                              | S-7             |
| Figure S4: Pseudo first order data fitting of data related to adsorption of iodine by iCON-4 from aqueous solution ..... | S-7             |
| Figure S5: Fitting of iodine adsorption data of iCON-4 using the Freundlich isotherm model from water .....              | S-8             |
| Table S3: Comparison table of iodine capture by adsorbents from aqueous solution.....                                    | S-8             |
| Figure S6: Column experiment setup for iodine adsorption by iCON-4 .....                                                 | S-9             |
| Figure S7: Iodine adsorption data of iCON-4 from iodine spiked (a) lake water (b) river water.....                       | S-10            |
| Figure S8: Iodine adsorption data of iCON-4 from iodine spiked (a) sea water (b) tap water.....                          | S-10            |
| Figure S9. Adsorption data of iCON-4 for the capture of pure iodine from water.....                                      | S-11            |
| Figure S10. Iodine adsorption data of iCON-4 from n-hexane solution.....                                                 | S-11            |
| Figure S11. Retention capacity of I <sub>2</sub> @iCON-4.....                                                            | S-12            |
| Figure S12. Probable schematic illustration of I <sub>2</sub> uptake mechanism by iCON-4 in vapor medium.....            | S-12            |
| Figure S13. Iodine release in methanol from I <sub>2</sub> @iCON-4.....                                                  | S-13            |
| Figur S14. Iodine release from I <sub>2</sub> @iCON-4 upon heating.....                                                  | S-13            |
| Figure S15. Reusability of iCON-4 towards the iodine uptake in vapor phase.....                                          | S-14            |
| Table S4: Comparison table of iodine capture by adsorbents from vapor phase.....                                         | S-14 to S16     |

## Experimental Section:

### Synthesis of triaminoguanidium chloride (TAG<sub>Cl</sub>):

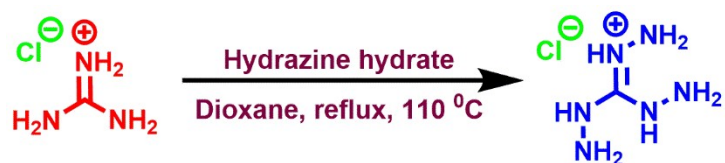

**Scheme S1.** Synthesis of triaminoguanidinium chloride (TAG<sub>Cl</sub>)

To a mixture of 1.91 g (20 mmol) of guanidinium hydrochloride, and 3.41 g (106 mmol) of hydrazine hydrate, 10 ml of 1, 4-dioxane was added under continuous stirring. The reaction mixture was refluxed for 2 hours. After that, the reaction mixture was allowed to cool down to room temperature and the product was filtered. Next, the product was washed with 1, 4-dioxane and dried to yield TAG<sub>Cl</sub>.

**Table S1: Solubility/insolubility chart of iCON-4**

| Organic Solvents     | Solubility |
|----------------------|------------|
| Methanol             | Insoluble  |
| Dimethyl Sulfoxide   | Insoluble  |
| Dimethylformamide    | Insoluble  |
| Dimethylacetamide    | Insoluble  |
| Acetonitrile         | Insoluble  |
| 1,2 – Dichloroethane | Insoluble  |
| Tetrahydrofuran      | Insoluble  |
| Toluene              | Insoluble  |
| Xylene               | Insoluble  |
| Ethyl acetate        | Insoluble  |
| Hexane               | Insoluble  |
| Dichloromethane      | Insoluble  |

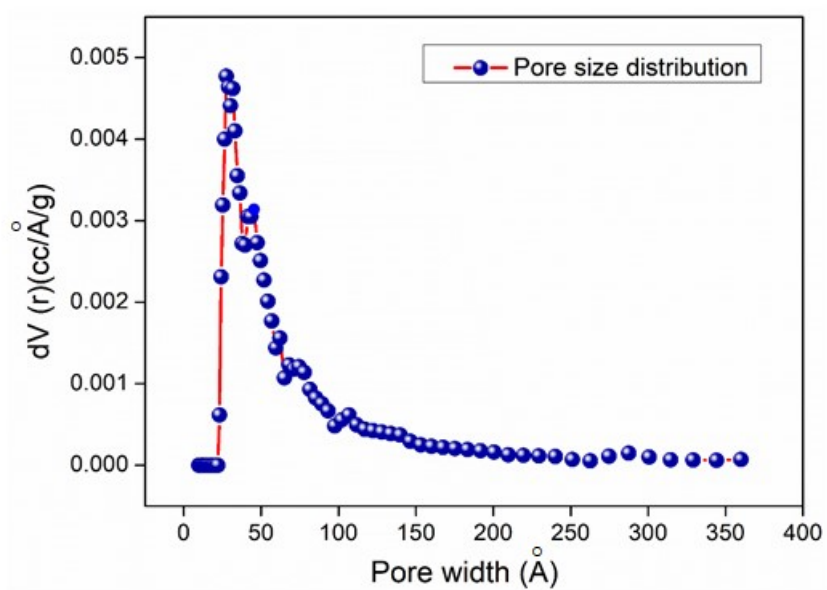

**Figure S1** : NLDFIT pore size distribution of iCON-4

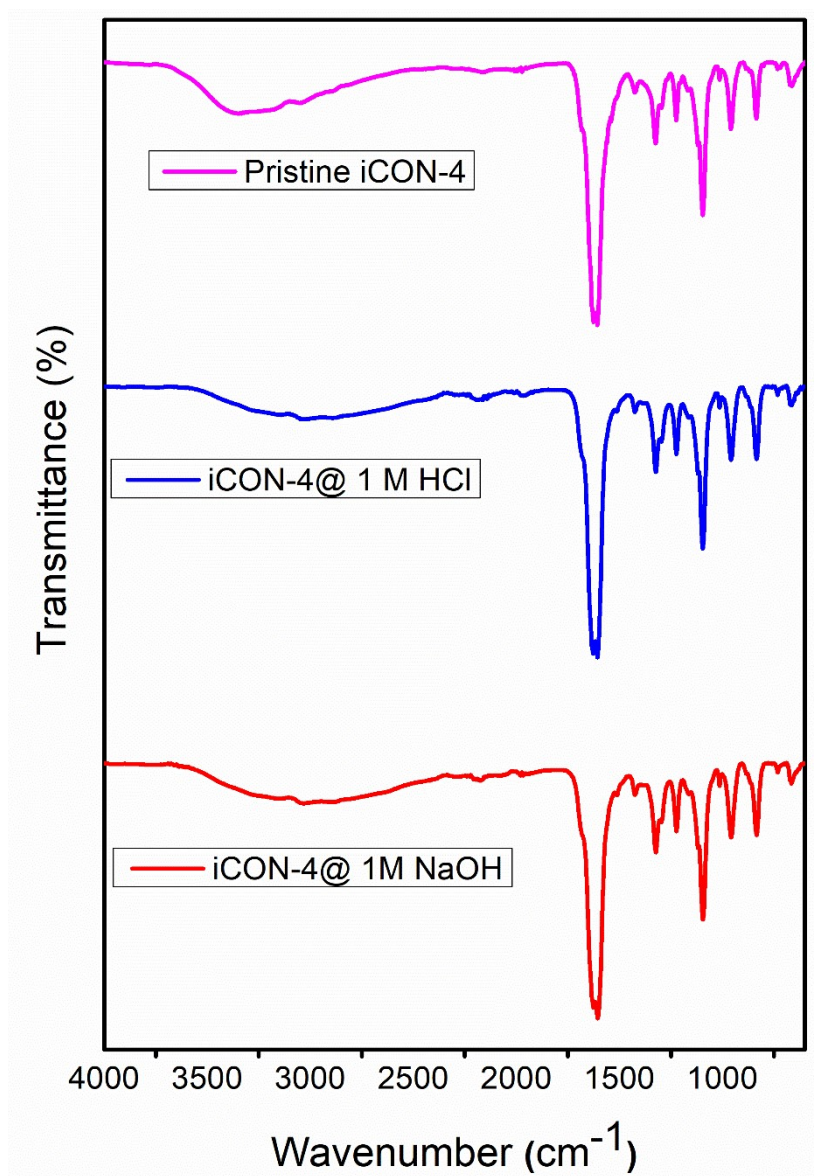

**Figure S2.** FTIR spectra of the iCON-4 along with acid and base treated iCON-4

**Table S2: Comparison table of time required to remove iodine adsorbents from aqueous solution**

| Compounds                | Contact time     | Selectivity                                                                                      | Recyclability | Ref                                                      |
|--------------------------|------------------|--------------------------------------------------------------------------------------------------|---------------|----------------------------------------------------------|
| iCON-4                   | 120 seconds      | Cl <sup>-</sup> , Br <sup>-</sup> , NO <sub>3</sub> <sup>-</sup> , SO <sub>4</sub> <sup>2-</sup> | 7             | <b>This work</b>                                         |
| CMP-4                    | 180 min          | NR                                                                                               | 5             | <i>Angew. Chem. Int. Ed.</i> 2021, 60, 8967–8975         |
| Compound-1<br>Compound-2 | 10 min<br>30 min | Cl <sup>-</sup> , Br <sup>-</sup> , NO <sub>3</sub> <sup>-</sup> , SO <sub>4</sub> <sup>2-</sup> | 4             | <i>ACS Appl. Mater. Interfaces</i> 2021, 13, 34188–34196 |

|                          |          |    |    |                                                                     |
|--------------------------|----------|----|----|---------------------------------------------------------------------|
|                          |          |    |    |                                                                     |
| Nanobones,<br>nanosheets | >78 mins | NR | NR | <i>ACS Appl. Mater. Interfaces</i> 2019,<br>11, 8537–8544           |
| Cu-BTC@PES               | >65min   | NR | 3  | <i>ACS Appl. Mater. Interfaces</i> 2019,<br>11, 42635–42645         |
| THPS-C                   | 120 min  | NR | 5  | <i>Adv. Mater. Interfaces</i> 2019,<br>1900249                      |
| TNHCPs                   | 120 min  | NR | 5  | <i>Separation and Purification<br/>Technology</i> 257 (2021) 117923 |
| H <sub>c</sub> OF-1      | 240 min  | NR | ND | <i>J. Am. Chem. Soc.</i> 2017, 139,<br>7172–7175                    |
| PTIBBL                   | 500 min  | NR | 5  | <i>Chem. Commun.</i> , 2020,56, 1401--<br>1404                      |
| NTP                      | 60 min   | NR | 5  | <i>ACS Macro Lett.</i> 2016, 5,<br>1039–1043                        |
| MBM                      | >30 min  | NR | NR | <i>Angew. Chem. Int. Ed.</i> 2018,<br>57,10148 –10152               |
| SCNU-Z4                  | >960 min | NR | NR | <i>Inorg. Chem. Front.</i> , 2021, 8, 1083–<br>1092                 |
| H <sub>c</sub> OF-3      | 240 min  | NR | NR | <i>J. Am. Chem. Soc.</i> 2019, 141,<br>10915–10923                  |

NR = Not reported

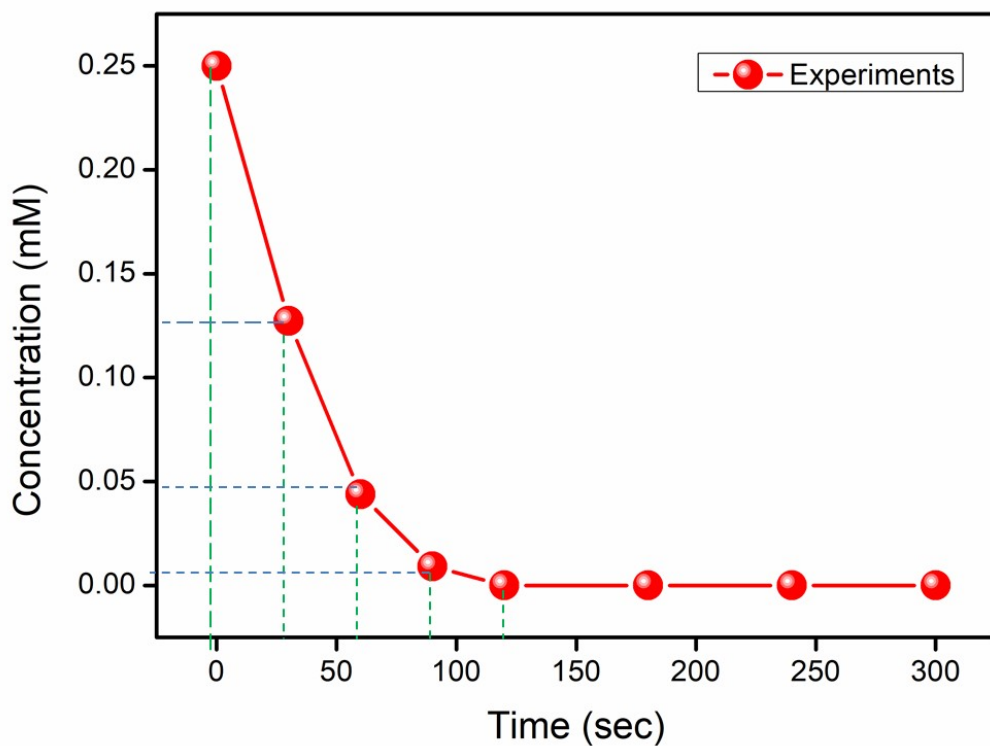

**Figure S3.** Change in concentration of iodine with time

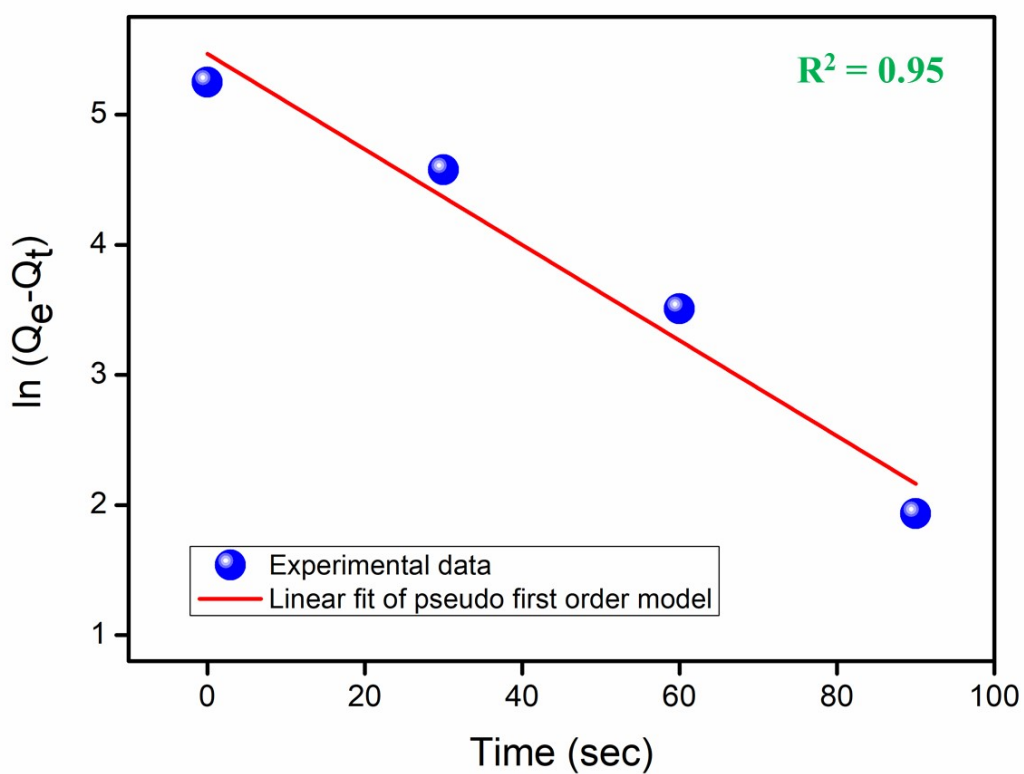

**Figure S4.** Pseudo first order data fitting of data related to adsorption of iodine by iCON-4 from aqueous solution

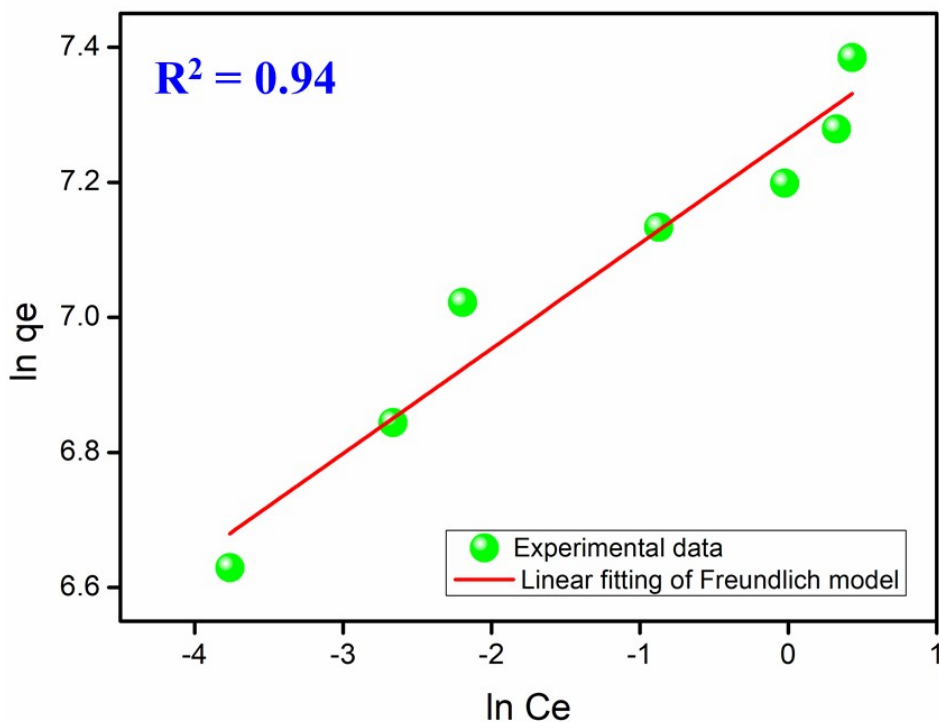

**Figure S5.** Fitting of iodine adsorption data of iCON-4 using the Freundlich isotherm model from water

**Table S3: Comparison table of iodine capture by adsorbents from aqueous solution**

| Adsorbents                                                                                                                               | Medium       | BET Surface area(m <sup>2</sup> /g) | I <sub>2</sub> uptake (mg·g <sup>-1</sup> ) | Reference                                               |
|------------------------------------------------------------------------------------------------------------------------------------------|--------------|-------------------------------------|---------------------------------------------|---------------------------------------------------------|
| <b>iCON-4</b>                                                                                                                            | <b>Water</b> | <b>30.55</b>                        | <b>1632.17</b>                              | <b><i>This Work</i></b>                                 |
| HcOF-1                                                                                                                                   | Water        | NR                                  | 2900                                        | <i>J. Am. Chem. Soc.</i> , 2017, <b>139</b> , 7172–7175 |
| Fe <sub>3</sub> O <sub>4</sub> @PPy                                                                                                      | Water        | NR                                  | 1627                                        | <i>J. Hazard. Mater.</i> , <b>344</b> (2018) 576–584    |
| PCN-223                                                                                                                                  | Water        | 642.089                             | 1615.882                                    | <i>Sep. Purif. Technol.</i> , <b>233</b> (2020) 115999  |
| PCN-223-HPP                                                                                                                              | Water        | 851.271                             | 1676.960                                    | <i>Sep. Purif. Technol.</i> , <b>233</b> (2020) 115999  |
| {[(ZnI <sub>2</sub> ) <sub>3</sub> (TPT) <sub>2</sub> ] <sub>n</sub> ·5.5(C <sub>6</sub> H <sub>3</sub> NO <sub>2</sub> ) <sub>n</sub> } | Water        | NR                                  | 1.73                                        | <i>Chem. Sci.</i> , 2017, <b>8</b> , 3171               |
| pSi–C composite                                                                                                                          | Water        | 762.13                              | 299.40                                      | <i>RSC Adv.</i> , 2021, <b>11</b> , 5268–5275           |
| TAPB-BPDA COF                                                                                                                            | Water        | 1082                                | 988.17                                      | <i>React. Funct. Polym.</i> , <b>159</b> (2021) 104806  |
| THPS-C                                                                                                                                   | Water        | 3125                                | 926                                         | <i>Adv. Mater. Inter.</i> , 2019, <b>6</b> , 1900249    |
| NTP                                                                                                                                      | Water        | 1067                                | 429                                         | <i>ACS Macro Lett.</i> , 2016, <b>5</b> , 1039          |
| Cadmium(II)-triazole                                                                                                                     | Water        | NR                                  | 110                                         | <i>Chem. Commun.</i> , 2011, <b>47</b> , 7185–7187      |



| MOF        |       |    |       |                                                         |
|------------|-------|----|-------|---------------------------------------------------------|
| MBM - MOF  | Water | 62 | 880   | <i>Angew. Chem., Int. Ed.</i> , 2018, <b>57</b> , 10148 |
| CdL2       | Water | NR | 460   | <i>Chem. Commun.</i> , 2011, <b>47</b> , 7185           |
| PVDF/ZIF-8 | Water | NR | 73.33 | <i>Sep. Purif. Technol.</i> , <b>238</b> (2020) 116488  |

NR= Not reported

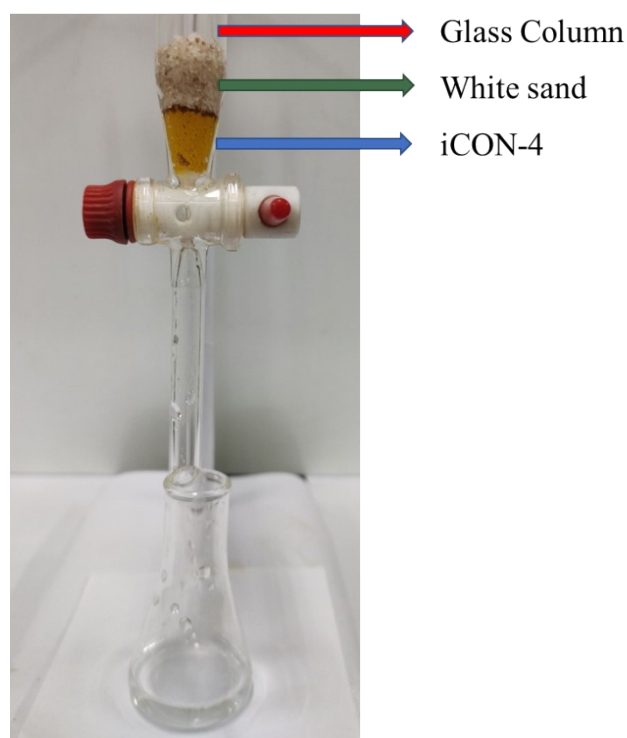

**Figure S6.** Column experiment setup for iodine adsorption by iCON-4

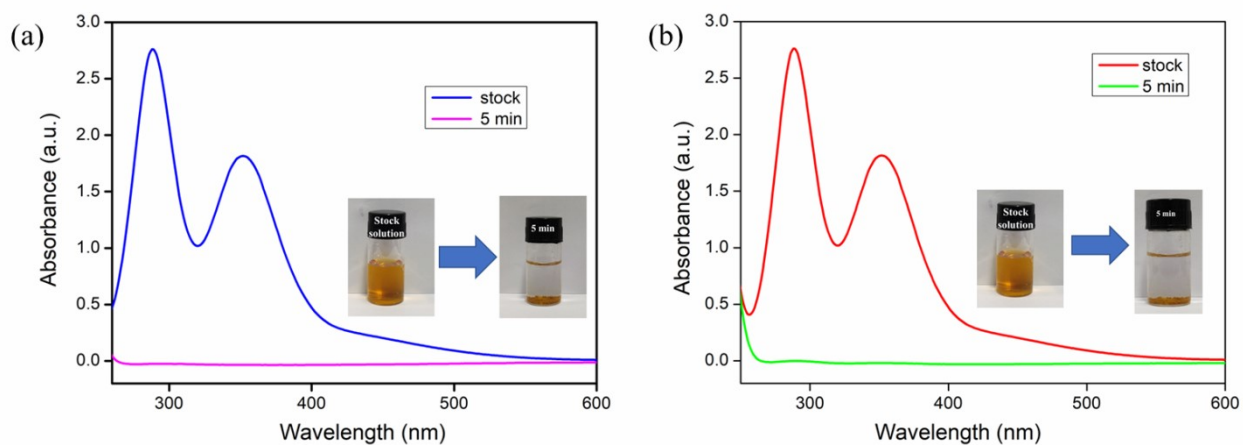

**Figure S7.** Iodine adsorption data of iCON-4 from iodine spiked (a) lake water (b) river water

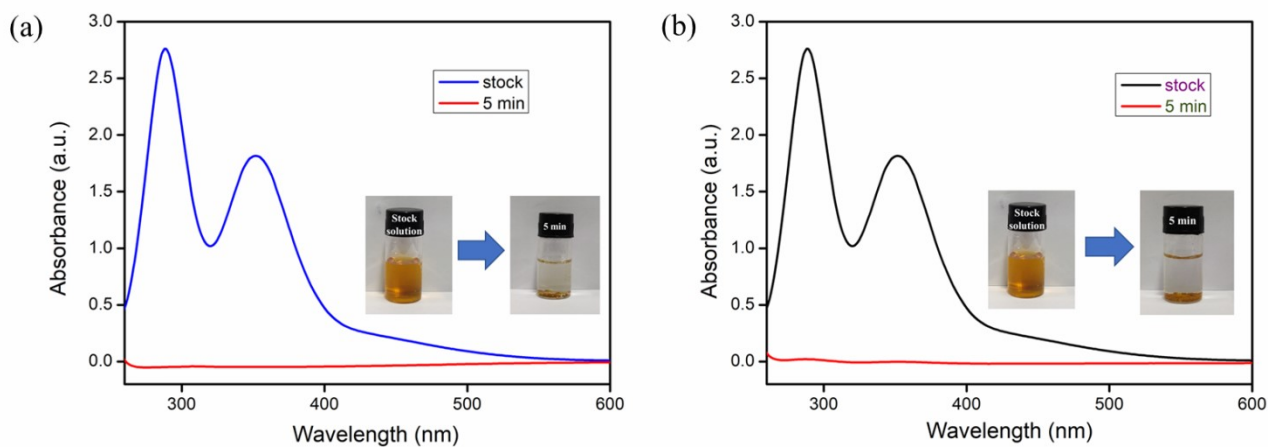

**Figure S8.** Iodine adsorption data of iCON-4 from iodine spiked (a) sea water (b) tap water

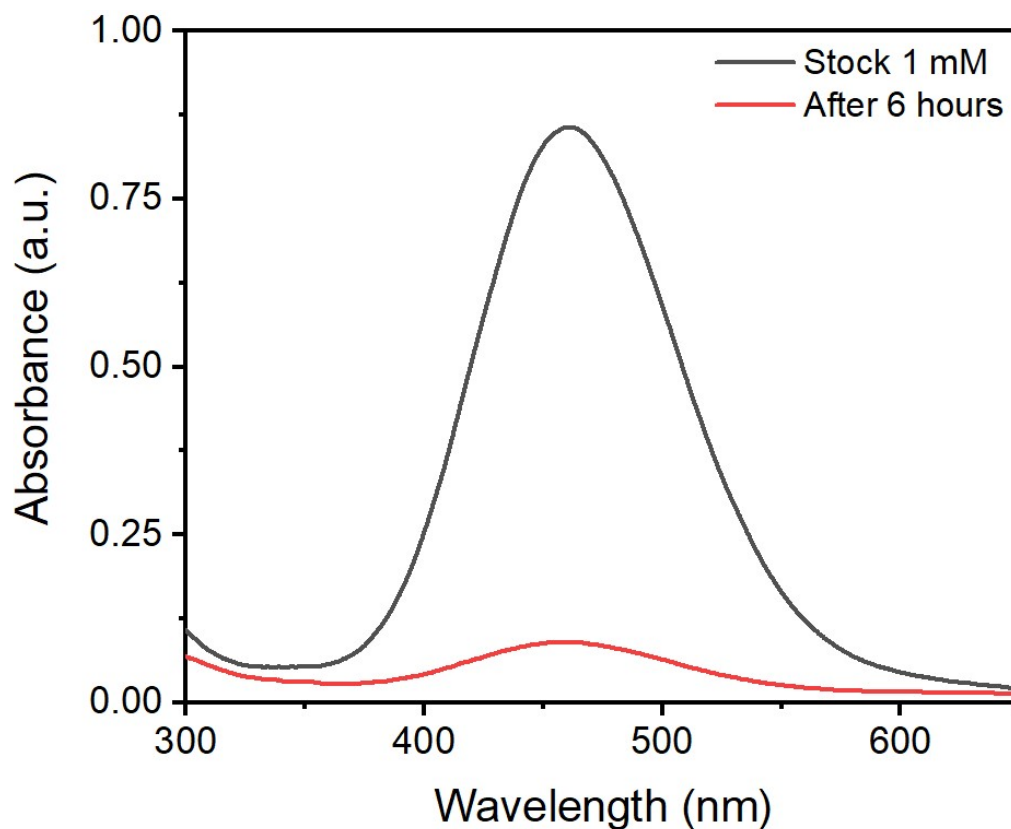

**Figure S9.** Adsorption data of iCON-4 for the capture of pure iodine from water.

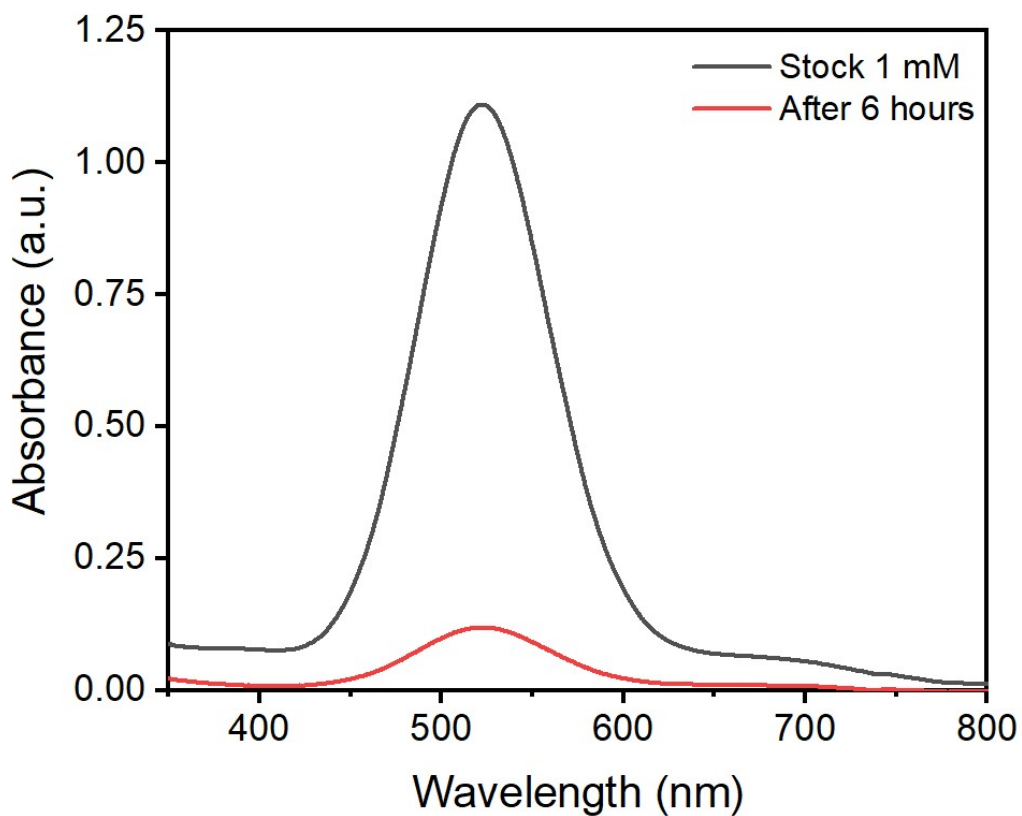

**Figure S10.** Iodine adsorption data of iCON-4 from n-hexane solution

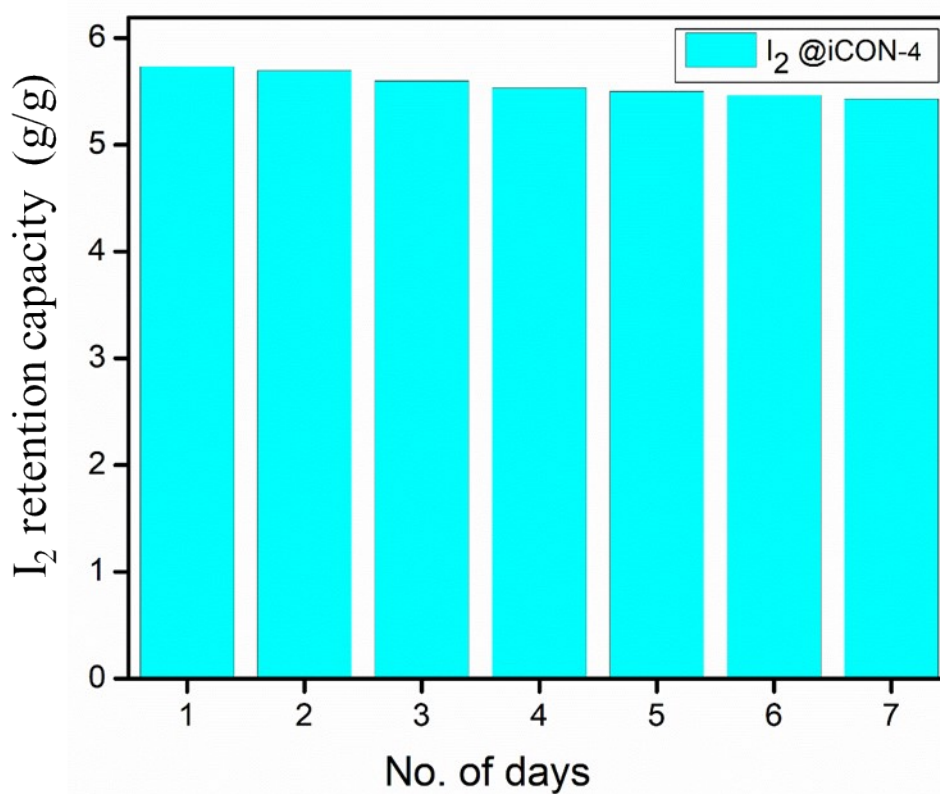

**Figure S11.** Retention capacity of I<sub>2</sub>@iCON-4

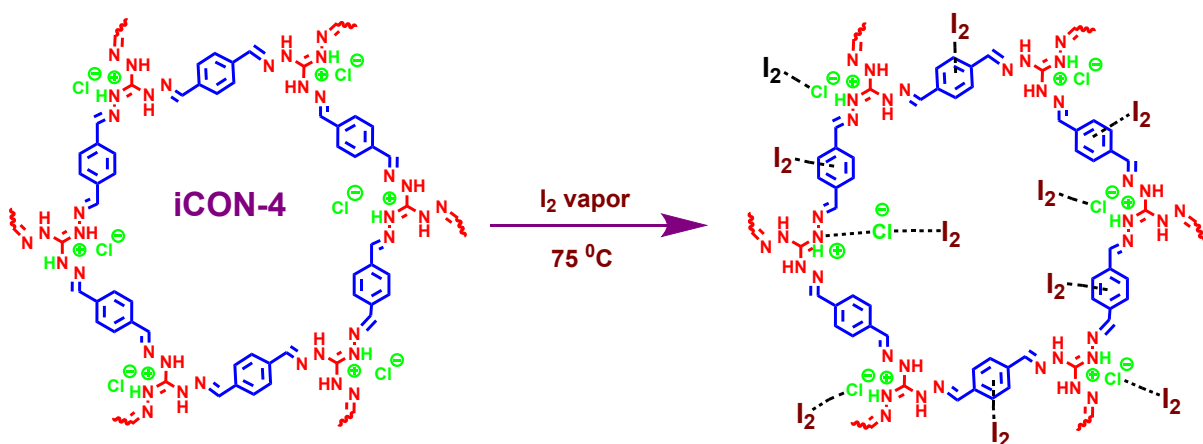

**Figure S12.** Probable schematic illustration of I<sub>2</sub> uptake mechanism by iCON-4 in vapor medium

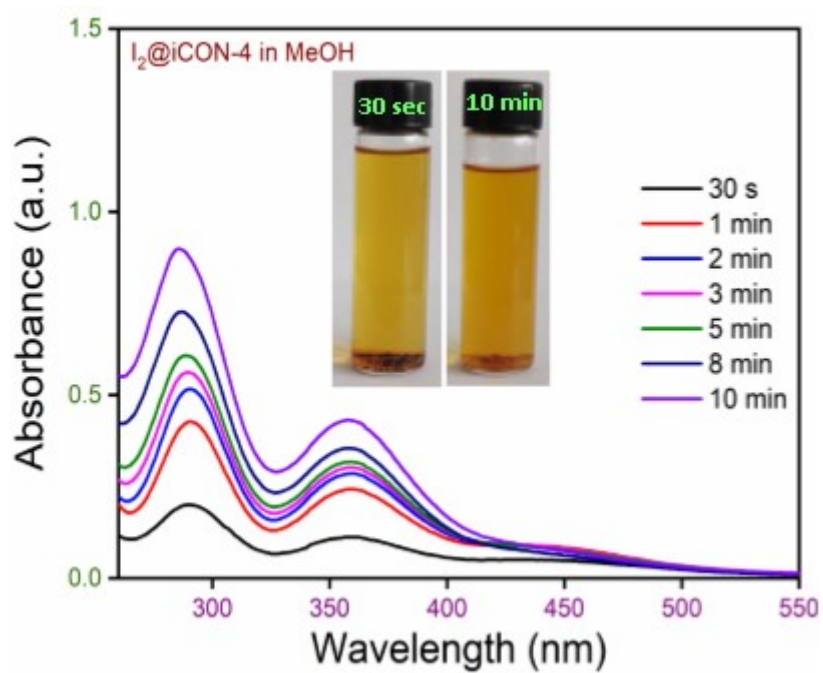

**Figure S13.** Iodine release in methanol from I<sub>2</sub>@iCON-4

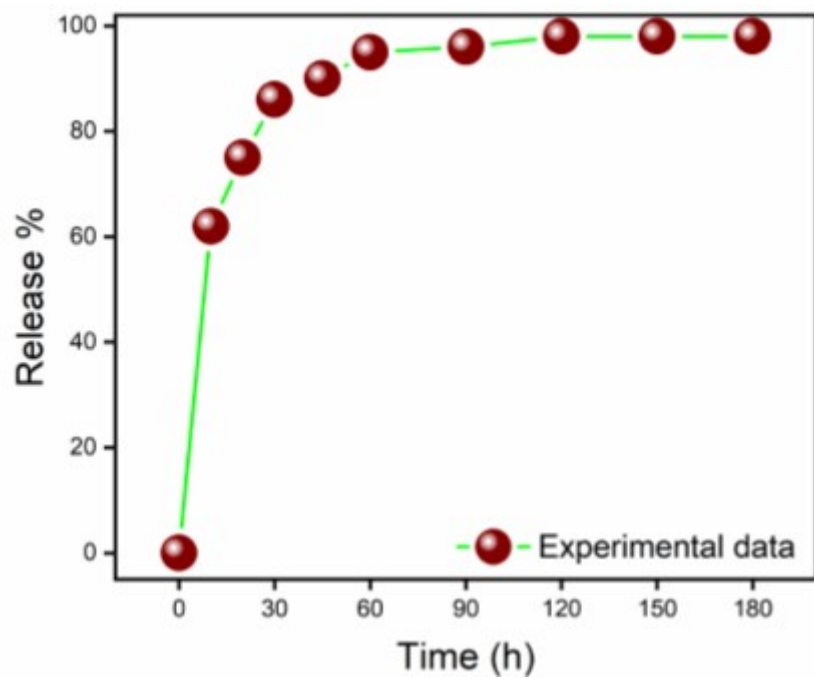

**Figure S14.** Iodine release from I<sub>2</sub>@iCON-4 upon heating

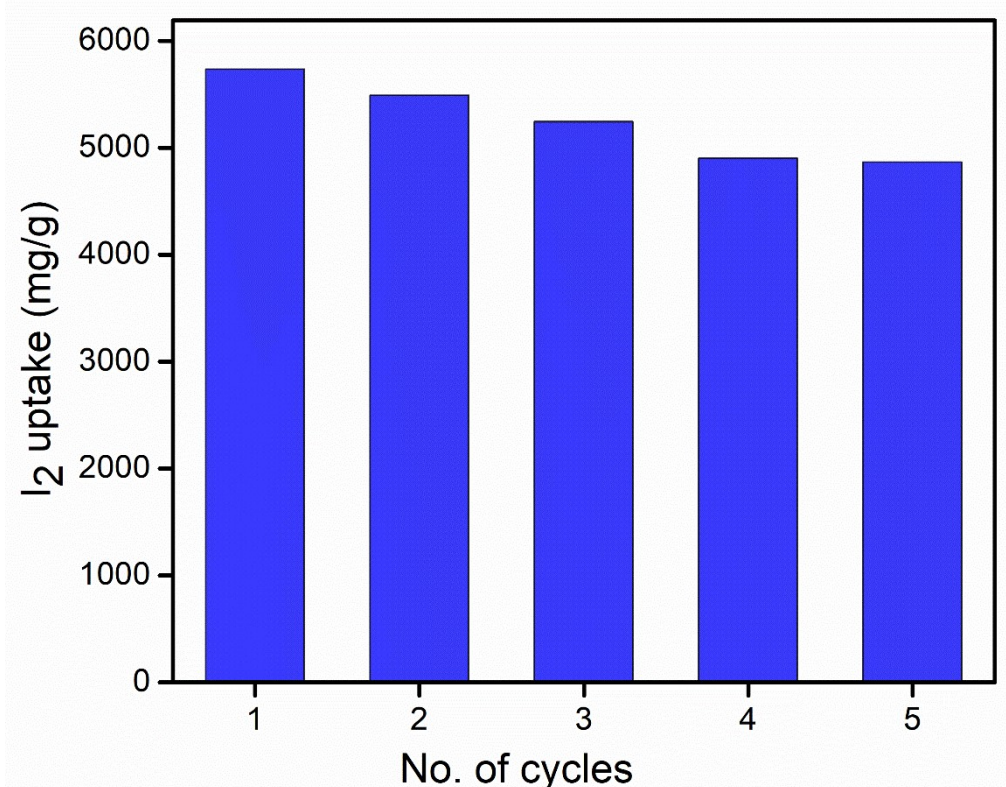

**Figure S 15.** Reusability of iCON-4 towards the iodine uptake in vapor phase

**Table S4: Comparison table of iodine capture by adsorbents from vapor phase**

| Adsorbents   | Temperature (°C) | BET Surface area(m <sup>2</sup> /g) | I <sub>2</sub> uptake (g·g <sup>-1</sup> ) | Reference                                               |
|--------------|------------------|-------------------------------------|--------------------------------------------|---------------------------------------------------------|
| iCON-4       | 75               | 30.55                               | 5.7                                        | <i>This Work</i>                                        |
| TPB-DMTP COF | 75               | 1927                                | 6.260                                      | <i>Adv. Mater.</i> , 2018, <b>30</b> , 1801991          |
| TBIM         | 77               | 8.12                                | 9.43                                       | <i>J. Mater. Chem. A</i> , 2020, <b>8</b> , 2820–2826   |
| TJNU-201     | 77               | 2510                                | 5.625                                      | <i>J. Mater. Chem. A</i> , 2020, <b>8</b> , 9523-9527   |
| NDB-H        | 75               | 117                                 | 4.430                                      | <i>Chem. Asian J.</i> , 2018, <b>13</b> , 2046-2053     |
| CMP-LS4      | 77               | 462                                 | 3.32                                       | <i>Polym. Chem.</i> , 2020, <b>11</b> ,2786             |
| PHF-1-Ct     | 80               | 690                                 | 4.05                                       | <i>Chem. Commun.</i> , 2018, <b>54</b> , 12706-12709    |
| PHF-1        |                  | 1046                                | 3.05                                       |                                                         |
| CTF-CTTD-500 | 75               | 1334                                | 3.87                                       | <i>Ind. Eng. Chem. Res.</i> , 2018, 57, 44, 15114–15121 |
| HCMP-3       | 75               | 92                                  | 3.36                                       | <i>Macromolecules</i> 2016, 49, 17, 6322–6333           |
| POP-1        | 80               | 12                                  | 3.570                                      | <i>J. Hazard. Mater.</i> , 2017, <b>338</b> , 224-232   |

|             |       |       |       |                                                                     |
|-------------|-------|-------|-------|---------------------------------------------------------------------|
| TBTT-CMP@3  | 77    | 62.89 | 3.52  | <i>Polym. Chem.</i> , 2020, <b>11</b> , 2786                        |
| Micro-COF-1 | 75    | 816   | 2.9   | <i>Ind. Eng. Chem. Res.</i> , 2019, <b>58</b> , 10495-10502.        |
| Micro-COF-2 |       | 1056  | 3.5   |                                                                     |
| Azo-Trip    | 77    | 510.4 | 2.36  | <i>Polym. Chem.</i> , 2016, <b>7</b> , 643                          |
| MOF-808     | 80    | 1930  | 2.18  | <i>ACS Appl. Mater. Interfaces</i> , 2020, <b>12</b> , 20429–20439. |
| PAN-B       | 75    | 1254  | 3.17  | <i>Polymer</i> , <b>194</b> (2020) 122401                           |
| PAN-T       |       | 1273  | 3.11  |                                                                     |
| PAF-24      | 75    | 136   | 2.76  | <i>Angew. Chem. Int. Ed.</i> , 2015, <b>54</b> , 12733–12737.       |
| N-HCP       | 75    | 222.8 | 2.57  | <i>Sep. Purif. Technol.</i> , <b>236</b> (2020) 116260              |
| CMPNH2      | 75    | 6.44  | 2.83  | <i>J. Mater. Chem. A</i> , 2020, <b>8</b> , 1966-1974.              |
| CPP 1       | 80    | NR    | 1.53  | <i>Polym. Chem.</i> , 2020, <b>11</b> ,3066                         |
| CPP 2       |       |       | 2.00  |                                                                     |
| CPP 3       |       |       | 1.40  |                                                                     |
| PAN-FPP5    | 71.85 | 788.0 | 1.45  | <i>Ind. Eng. Chem. Res.</i> , 2020, <b>59</b> , 3269-3278.          |
| PAN-TPDA    | 71.85 | 752.0 |       |                                                                     |
| NRPP-1      | 80    | 1579  | 1.92  | <i>ACS Appl. Mater. Interfaces</i> , 2018, <b>10</b> , 16049-16058  |
| NRPP-2      |       | 1028  | 2.22  |                                                                     |
| CBP1        | 80    | 3.0   | 145   | <i>Polym. Chem.</i> , <b>2021</b> , <b>12</b> ,2282                 |
| CBP2        |       | 143   | 101   |                                                                     |
| CBP3        |       | 794   | 135   |                                                                     |
| CBP4        |       | 98    | 140   |                                                                     |
| CBP5        |       | 203   | 166   |                                                                     |
| CMPN-3      | 70    | 1368  | 2.080 | <i>J. Mater. Chem. A</i> , 2015, <b>3</b> , 87-91.                  |
| HKUST-1     | 75    | NR    | 1.75  | <i>Chem. Mater.</i> , 2013, <b>25</b> , 2591                        |
| ZIF-8       | 77    | 1630  | 1.250 | <i>J. Am. Chem. Soc.</i> , 2011, <b>133</b> , 12398-12401           |

NR = Not reported
